# Supplementary material
Source: Royal Society of Chemistry journal article supplement (doi:10.1039/d6dt00461j)
Supplement: d6dt00461j1.pdf [file d6dt00461j1.pdf]

# **Fe<sub>3</sub>O<sub>4</sub>-Functionalized UiO-66 with Facile Magnetic Recovery for High-Capacity and Rapid Uranium Removal from Contaminated Aqueous Solutions**

*Yunhu Hu*<sup>1,2</sup>, *Zilong Chen*<sup>2</sup>, *Dunpeng You*<sup>2</sup>, *Renpeng Tu*<sup>2</sup>, *Mai Xu*<sup>2</sup>, *Jianfeng Zhang*<sup>2</sup>,

*Jing Zhao*<sup>2</sup>, *Mu You*<sup>1,3\*</sup>

<sup>1</sup>*Engineering Technology Research Center of Coal Resources Comprehensive Utilization,  
Huainan, Anhui 232001, P.R. China*

<sup>2</sup>*School of Chemistry and Material Engineering, Huainan Normal University, Huainan,  
Anhui 232038, P.R. China*

<sup>3</sup>*School of Biology Engineering, Huainan Normal University, Huainan, Anhui 232038, P.R. China*

*\*Corresponding author:*

*Email address: youmu@ustct.edu.cn (M. You)*

## Materials:

Zirconium chloride ( $\text{ZrCl}_4$ ), terephthalic acid ( $\text{H}_2\text{BDC}$ ), N-N dimethylformamide (DMF), trifluoroacetic acid (TFA), Methanol, urea ( $\text{H}_2\text{NCONH}_2$ ), iron (III) chloride hexahydrate ( $\text{FeCl}_3 \cdot 6\text{H}_2\text{O}$ ), trisodium citrate ( $\text{C}_6\text{H}_5\text{Na}_3\text{O}_7 \cdot 2\text{H}_2\text{O}$ ), polyacrylamide (PAM,  $[\text{CH}_2\text{CH}(\text{CONH}_2)]_n$ ), and ethanol (EtOH) are analytical grade and used without further purification. All chemicals were purchased from Sinopharm Chemical Reagent Co. Ltd.

## Characterization

The surface morphology of the as-prepared samples was characterized using a ZEISS G300 field-emission scanning electron microscope (FE-SEM). The crystal structure was determined by a Philips X'pert PRO X-ray diffractometer (XRD). Thermal stability tests were performed on a DTG-60H thermogravimetric analyzer, where thermogravimetric analysis (TGA) was carried out in an air atmosphere from room temperature to  $500^\circ\text{C}$ . X-ray photoelectron spectroscopy (XPS) data were collected using a Thermo VG Scientific ESCALAB250 photoelectron spectrometer to analyze elemental composition and chemical states. Magnetic hysteresis (M-H) loops of the samples were measured at room temperature with a Quantum Design Corp MPMS XL5 magnetometer.

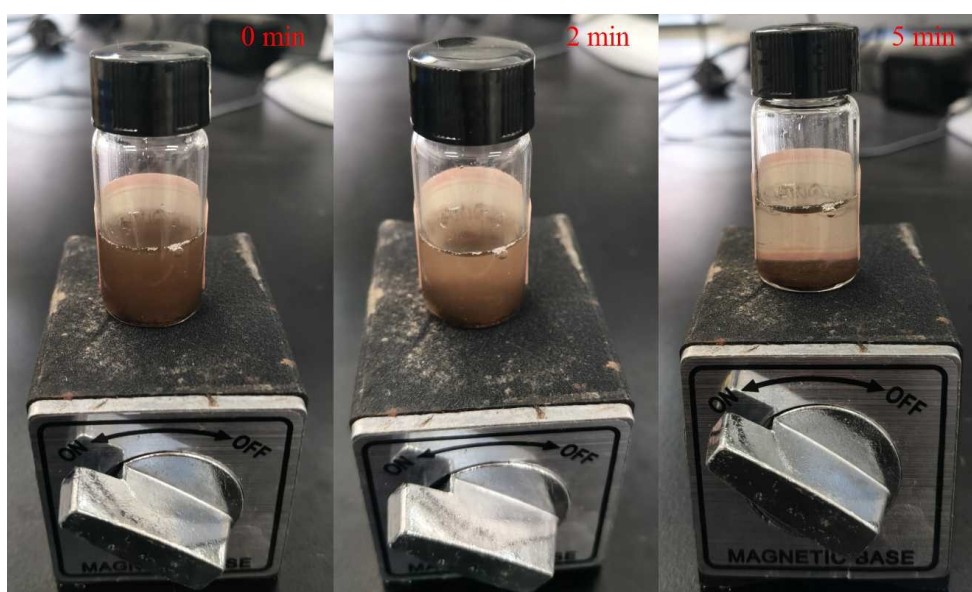

**Figure S1.** Photograph of the magnetic separation process of Fe<sub>3</sub>O<sub>4</sub>@UiO-66.

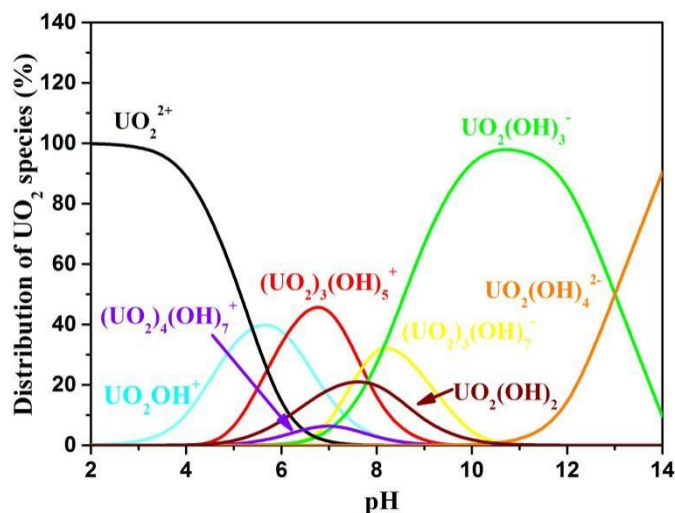

**Figure S2.** The relative distribution of U (VI) species as a function of pH in aqueous solutions.

**Table S1.** Equations and nomenclatures of the two isotherm models ( $C_e$  (mg/L) and  $Q_e$  (mg/g) refer to the U(VI) concentration and the adsorption capacity at equilibrium, respectively).

| Equations                             | Nomenclatures                                |                                                                    |
|---------------------------------------|----------------------------------------------|--------------------------------------------------------------------|
| $Q_e = \frac{bC_e Q_{max}}{bC_e + 1}$ | $b$ (L/g)                                    | Langmuir constant related to the free energy for adsorption        |
|                                       | $Q_{max}$ (mg/g)                             | Langmuir monolayer adsorption capacity                             |
| $Q_e = K_f C_e^{1/n}$                 | $K_f$ (mol <sup>1-n</sup> L <sup>n</sup> /g) | Freundlich constant of the relative adsorption capacity of the EIR |
|                                       | $n$                                          | Freundlich constant of the heterogeneity factor                    |

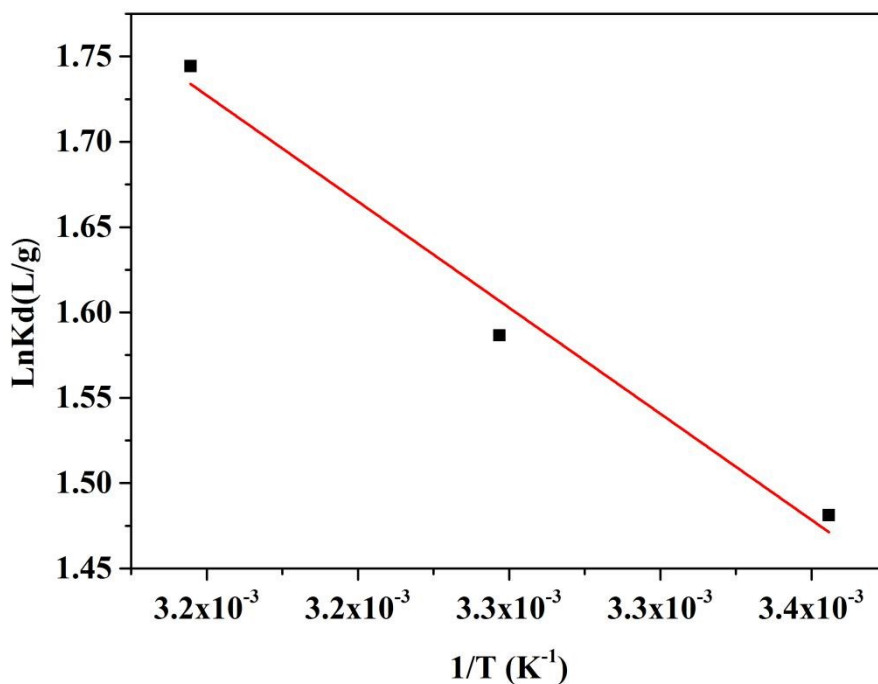

**Figure S3.** The plot of  $1/T$  versus  $\ln K_d$  (pH=8.0, t=24 h).

**Table S2.** Thermodynamic parameters for the U(VI) adsorption process on  $\text{Fe}_3\text{O}_4@\text{UiO}-66$ .

| T (K)  | $\Delta G^0$ (kJ/mol) | $\Delta H^0$ (kJ/mol) | $\Delta S^0$ (J/mol·K) |
|--------|-----------------------|-----------------------|------------------------|
| 298.15 | -3.67                 | 4.58                  | 27.68                  |
| 308.15 | -4.06                 |                       |                        |
| 318.15 | -4.61                 |                       |                        |

**Table S3.** Equations and nomenclatures of the three kinetic models ( $Q_e$  and  $Q_t$  refer to the amounts of U(VI) adsorbed at equilibrium and designed time t, respectively).

| Equations | Nomenclatures |
|-----------|---------------|
|           |               |

|                                                        |                                  |                                                 |
|--------------------------------------------------------|----------------------------------|-------------------------------------------------|
| $Q_t = Q_e(1 - e^{-k_1 t})$                            | $k_1$ (min <sup>-1</sup> )       | Pseudo-first-order rate constant                |
| $\frac{t}{Q_t} = \frac{1}{2k_2 Q_e^2} + \frac{t}{Q_e}$ | $k_2$ (g/mg·min)                 | Pseudo-second-order rate constant               |
| $Q_t = k_i \sqrt{t} + C$                               | $k_i$ (mg/g·min <sup>1/2</sup> ) | Intra-particle diffusion constant               |
|                                                        | $C$                              | Intercept in the intra-particle diffusion model |

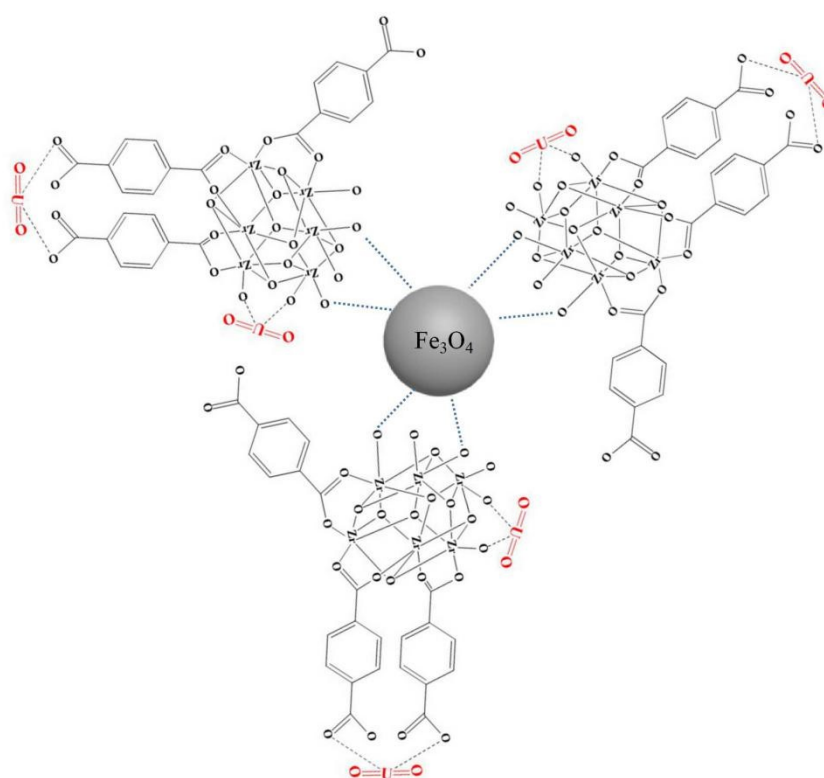

**Figure S4.** Schematic diagram of the mechanism of Zr-O<sup>-</sup> complexation with U(VI).
